# Supplementary material for: Data-Driven Optimization of DIA Mass Spectrometry by DO-MS
Source: PubMed Central journal article supplement (PMC10591957; doi:10.1021/acs.jproteome.3c00177), 2023-09-11
Supplement: NIHMS1931279-supplement-2.pdf [file NIHMS1931279-supplement-2.pdf]

## ■ ASSOCIATED CONTENT

### SI Supporting Information

The Supporting Information is available free of charge at <https://pubs.acs.org/doi/10.1021/acs.jproteome.3c00177>.

Plots with detailed information for all experiments described in the research article and the reports exemplifying the utility of DO-MS v2.0 ([ZIP](#))
